# Supplementary material for: Combined Liquid Biopsy Methylation Analysis of CADM1 and MAL in Cervical Cancer Patients
Source: MDPI journal article supplement (doi:10.3390/cancers14163954), 2022-08-16
Supplement: s1 [file s1]

# Combined Liquid Biopsy Methylation Analysis of CADM1 and MAL in Cervical Cancer Patients

## Supplements:

Table S1: Clinical characteristics of cervical dysplasia patients.

|                                            |                                | Count (N=52) | %     |
|--------------------------------------------|--------------------------------|--------------|-------|
| Age <sup>a</sup>                           | ≤35                            | 20           | 38.5% |
|                                            | >35                            | 32           | 61.5% |
| Grade of dysplasia                         | CIN 2                          | 10           | 19.2% |
|                                            | CIN 3                          | 42           | 80.8% |
| Cytological status<br>(Pap classification) | I                              | 1            | 1.9%  |
|                                            | II-a                           | 6            | 11.5% |
|                                            | II-p                           | 1            | 1.9%  |
|                                            | II-g                           | 1            | 1.9%  |
|                                            | III-p                          | 2            | 3.9%  |
|                                            | IIID1                          | 4            | 7.7%  |
|                                            | IIID2                          | 9            | 17.3% |
|                                            | IVa-p                          | 24           | 46.2% |
|                                            | IVa-g                          | 1            | 1.9%  |
|                                            | IVb-p                          | 1            | 1.9%  |
|                                            | V-p                            | 2            | 3.9%  |
| HPV status                                 | Positive for one subtype       | 21           | 40.4% |
|                                            | Positive for multiple subtypes | 28           | 53.8% |
|                                            | Negative                       | 3            | 5.8%  |
| Most frequent subtypes                     | HPV 16                         | 24           | 46.2% |
|                                            | HPV 18                         | 5            | 9.6%  |
|                                            | HPV 31                         | 4            | 7.7%  |
| HPV vaccination                            | Not vaccinated                 | 42           | 80.8% |
|                                            | Vaccinated <sup>b</sup>        | 6            | 11.5% |
|                                            | Unknown                        | 4            | 7.7%  |

a. Mean age of onset in Germany is 35.<sup>1</sup>

b. All 6 patients are positive for HPV:

4 patients are positive for an HPV subtype against which they have not been vaccinated; 1 patient was vaccinated later than the recommended timing; 1 patient has multiple HPV infections due to a history of AML and corresponding immunosuppressive phase.

Table S2: Clinical characteristics of cervical cancer patients.

|                         |                                    | Count (N=24) | %     |
|-------------------------|------------------------------------|--------------|-------|
| Age <sup>a</sup>        | ≤55                                | 18           | 75.0% |
|                         | >55                                | 6            | 25.0% |
| TNM                     | T1aN0M0                            | 4            | 16.7% |
|                         | T1bN0M0                            | 5            | 20.8% |
|                         | T2bN0M0                            | 2            | 8.3%  |
|                         | T1-4N1M0                           | 9            | 37.5% |
|                         | T1-4N0-1M1                         | 4            | 16.7% |
|                         |                                    |              |       |
| FIGO stage              | IA                                 | 4            | 16.7% |
|                         | IB                                 | 5            | 20.8% |
|                         | IIB                                | 2            | 8.3%  |
|                         | IIIC                               | 9            | 37.5% |
|                         | IVB                                | 4            | 16.7% |
| Tumor grade             | G1                                 | 2            | 8.3%  |
|                         | G2                                 | 14           | 58.3% |
|                         | G3                                 | 6            | 25.0% |
|                         | Unknown                            | 2            | 8.3%  |
|                         |                                    |              |       |
| Histology               | Squamos cell carcinoma             | 22           | 91.7% |
|                         | Adenocarcinoma                     | 2            | 8.3%  |
| HPV status              | Positive                           | 17           | 70,8% |
|                         | Negative                           | 1            | 4,2%  |
|                         | Unknown                            | 6            | 25.0% |
| Point of blood sampling | Before therapy <sup>b</sup>        | 12           | 50.0% |
|                         | Under ongoing therapy <sup>c</sup> | 12           | 50.0% |

a. Mean age of onset in Germany is 55. <sup>1</sup>

b. 7 initial diagnoses, 2 initial diagnoses after conization (local R1), 3 relapse diagnoses.

c. 5 under radiochemotherapy, 5 under chemotherapy, 2 between tumor surgery (local R0) and radiochemotherapy.

Table S3: CADM1, MAL and CADM1 and/or MAL methylation status of blood samples from 24 cervical cancer patients in relation to histological subtype.

|                  | Histology               |       |                |       |
|------------------|-------------------------|-------|----------------|-------|
|                  | Squamous cell carcinoma |       | Adenocarcinoma |       |
|                  | Count (N=22)            | %     | Count (N=2)    | %     |
| CADM1            | 17                      | 77.3% | 1              | 50.0% |
| MAL              | 10                      | 45.5% | 0              | 0.0%  |
| CADM1 and/or MAL | 19                      | 86.4% | 1              | 50.0% |

Table S4: CADM1, MAL and CADM1 and/or MAL methylation status of blood samples from 24 cervical cancer patients in relation to tumor grade.

|                  | Tumor grade    |       |                 |       |                |        |                |        |
|------------------|----------------|-------|-----------------|-------|----------------|--------|----------------|--------|
|                  | G1             |       | G2              |       | G3             |        | Unknown        |        |
|                  | Count<br>(N=2) | %     | Count<br>(N=14) | %     | Count<br>(N=6) | %      | Count<br>(N=2) | %      |
| CADM1            | 0              | 0.0%  | 11              | 78.6% | 5              | 83.3%  | 2              | 100.0% |
| MAL              | 1              | 50.0% | 3               | 21.4% | 5              | 83.3%  | 1              | 50.0%  |
| CADM1 and/or MAL | 1              | 50.0% | 11              | 78.6% | 6              | 100.0% | 2              | 100.0% |

Table S5: CADM1, MAL and CADM1 and/or MAL methylation status of blood samples from 24 cervical cancer patients in relation to HPV status.

|                  | HPV status      |       |                |        |                |       |
|------------------|-----------------|-------|----------------|--------|----------------|-------|
|                  | Positive        |       | Negative       |        | Unknown        |       |
|                  | Count<br>(N=17) | %     | Count<br>(N=1) | %      | Count<br>(N=6) | %     |
| CADM1            | 14              | 82.4% | 1              | 100.0% | 3              | 50.0% |
| MAL              | 8               | 47.1% | 0              | 0.0%   | 2              | 33.3% |
| CADM1 and/or MAL | 16              | 94.1% | 1              | 100.0% | 3              | 50.0% |

## References

1. Barnes, B.; Kraywinkel, K.; Nowossadeck, E.; Schönfeld, I.; Starker, A.; Wienecke, A.; Wolf, U. *Bericht zum Krebsgeschehen in Deutschland 2016*; Robert Koch-Institut: Berlin, Germany, 2016..
